# Supplementary material
Source: Springer Nature journal article supplement (https://www.springermedizin.de/resource/supplementary/12955_2010_748_MOESM9_ESM.pdf/9560910)

# Samples

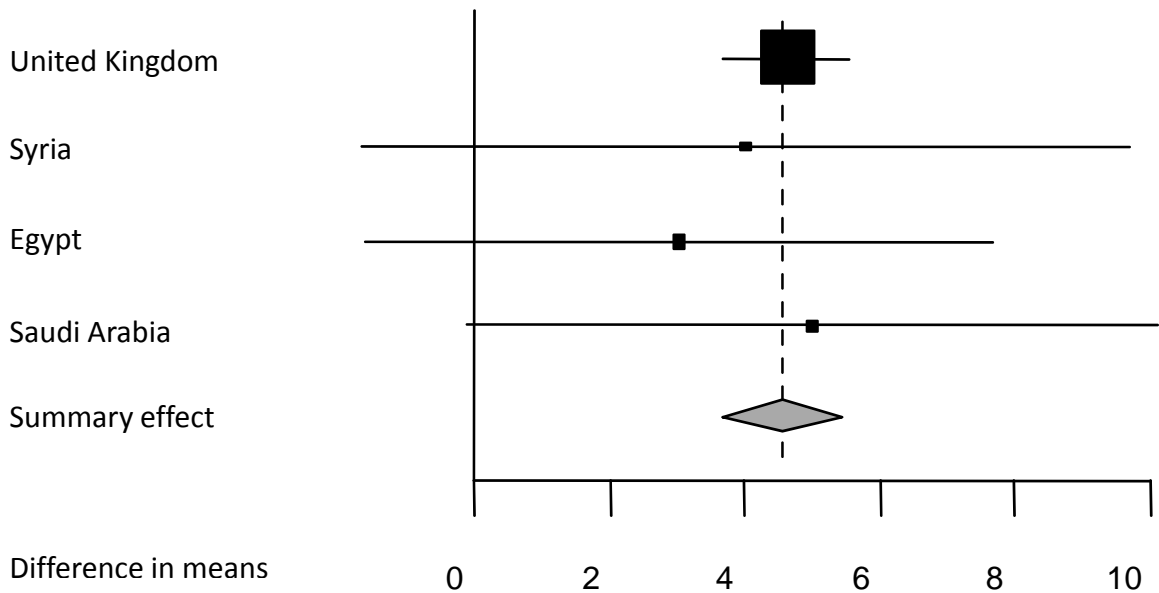

Comparison

0-19 vs. 20 and more teeth

Supplement: MOESM9 [file 9560910]
